# Supplementary material
Source: PubMed Central journal article supplement (PMC3989375)
Supplement: NIHMS532721-supplement-supplement_1.pdf [file NIHMS532721-supplement-supplement_1.pdf]

Table E1 Correlation of Methylation sites

Correlation  
Matrix<sup>1</sup>

|      | CPG1 | CPG2 | CPG3 | CPG4 | CPG5 | CPG6 | CPG7 | CPG8 |
|------|------|------|------|------|------|------|------|------|
| CPG1 | 1    | 0.38 | 0.54 | 0.42 | 0.35 | 0.43 | 0.39 | 0.45 |
| CPG2 |      | 1    | 0.20 | 0.21 | 0.18 | 0.28 | 0.24 | 0.29 |
| CPG3 |      |      | 1    | 0.60 | 0.52 | 0.56 | 0.44 | 0.44 |
| CPG4 |      |      |      | 1    | 0.73 | 0.59 | 0.56 | 0.52 |
| CPG5 |      |      |      |      | 1    | 0.64 | 0.60 | 0.45 |
| CPG6 |      |      |      |      |      | 1    | 0.79 | 0.76 |
| CPG7 |      |      |      |      |      |      | 1    | 0.75 |
| CPG8 |      |      |      |      |      |      |      | 1    |

Clade 1

Clade 2

Clade 3

Values denote Pearson correlation coefficients for 177 subjects

Table E2. The association between percent methylation at *ADRB2* and asthma outcomes, stratified by sample type

| Dyspnea                             |                                  |         |                                  |                                 |
|-------------------------------------|----------------------------------|---------|----------------------------------|---------------------------------|
|                                     | Combined sample                  |         | Saliva                           | Blood                           |
| Predictor                           | OR (95%CI) <sup>a</sup><br>N=177 | p-value | OR (95%CI) <sup>b</sup><br>N=136 | OR (95%CI) <sup>b</sup><br>N=41 |
| Average methylation of <i>ADRB2</i> | 0.2 (0.1 – 0.6)                  | 0.002   | 0.3 (0.1 – 0.8)                  | 0.01 (<0.1 – 0.6)               |
| Clade 1                             | 0.2 (0.04 – 0.7)                 | 0.01    | 0.2 (0.04 – 1.0)                 | 0.003 (<0.1 – 1.0)              |
| Clade 2                             | 0.4 (0.2 – 0.8)                  | 0.01    | 0.5 (0.2 – 1.2)                  | 0.1 (0.02 – 0.9)                |
| Clade 3                             | 0.4 (0.2 – 0.7)                  | 0.004   | 0.4 (0.2 – 0.9)                  | 0.04 (<0.1 – 0.8)               |

<sup>a</sup>adjusted for age, race, gender, preterm birth, family history of asthma, diagnosis of eczema and sample type

<sup>b</sup>adjusted for age, race, gender, preterm birth, and diagnosis of eczema. Family history of asthma omitted due to model instability.

OR: Odds ratio; 95%CI: 95% Confidence Interval of the odds ratio point estimate
